# Supplementary material for: Real-World Clinical Performance of a DNA-Based Comprehensive Genomic Profiling Assay for Detecting Targetable Fusions in Nonsquamous NSCLC
Source: PubMed Central journal article supplement — Oncologist. 2024 Feb 24;29(8):e984–96. doi: 10.1093/oncolo/oyae028 (PMC11299949; doi:10.1093/oncolo/oyae028), 2024-02-24
Supplement: oyae028_suppl_supplementary_materials.pdf [file oyae028_suppl_supplementary_materials.pdf]

## FMI DNA CGP

N = 459,751

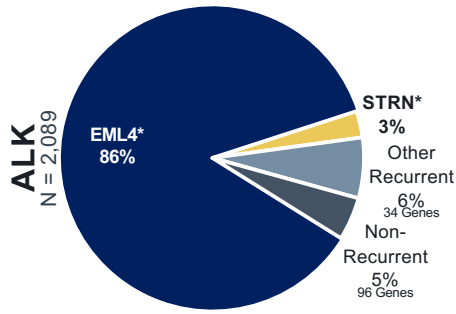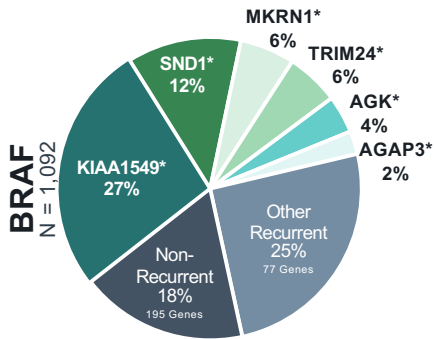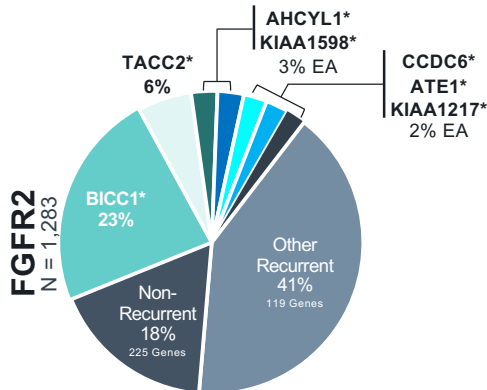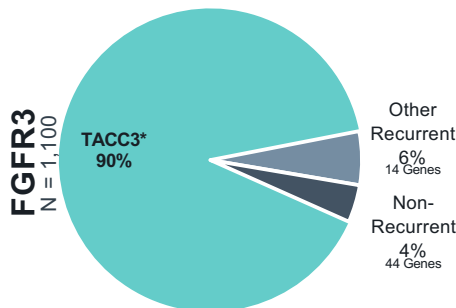

## GENIE v13.1

N = 97,592

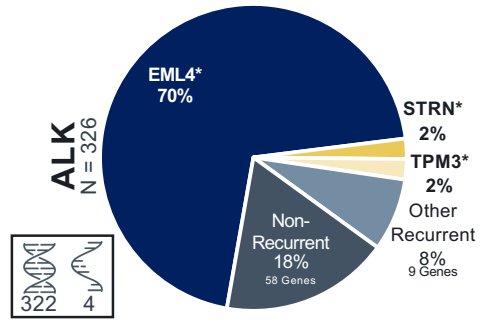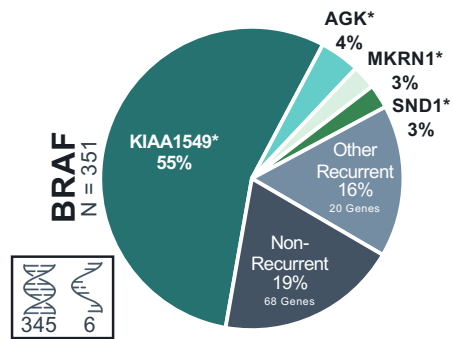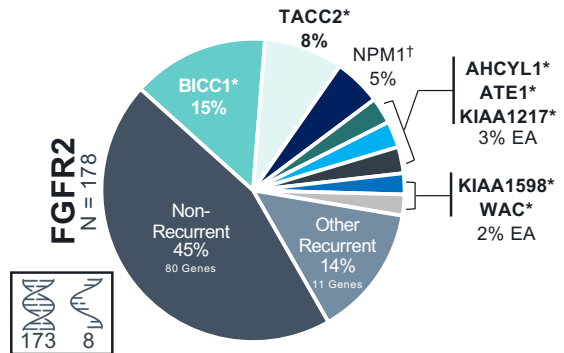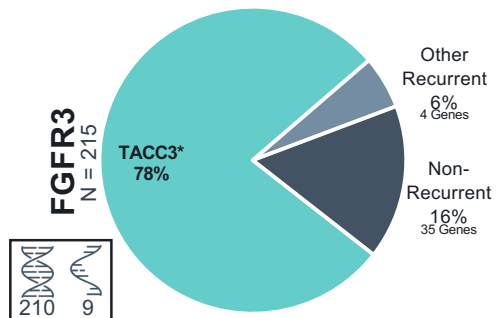

GENE NAME\* = OBSERVED AS FUSION PARTNER IN BOTH COHORTS

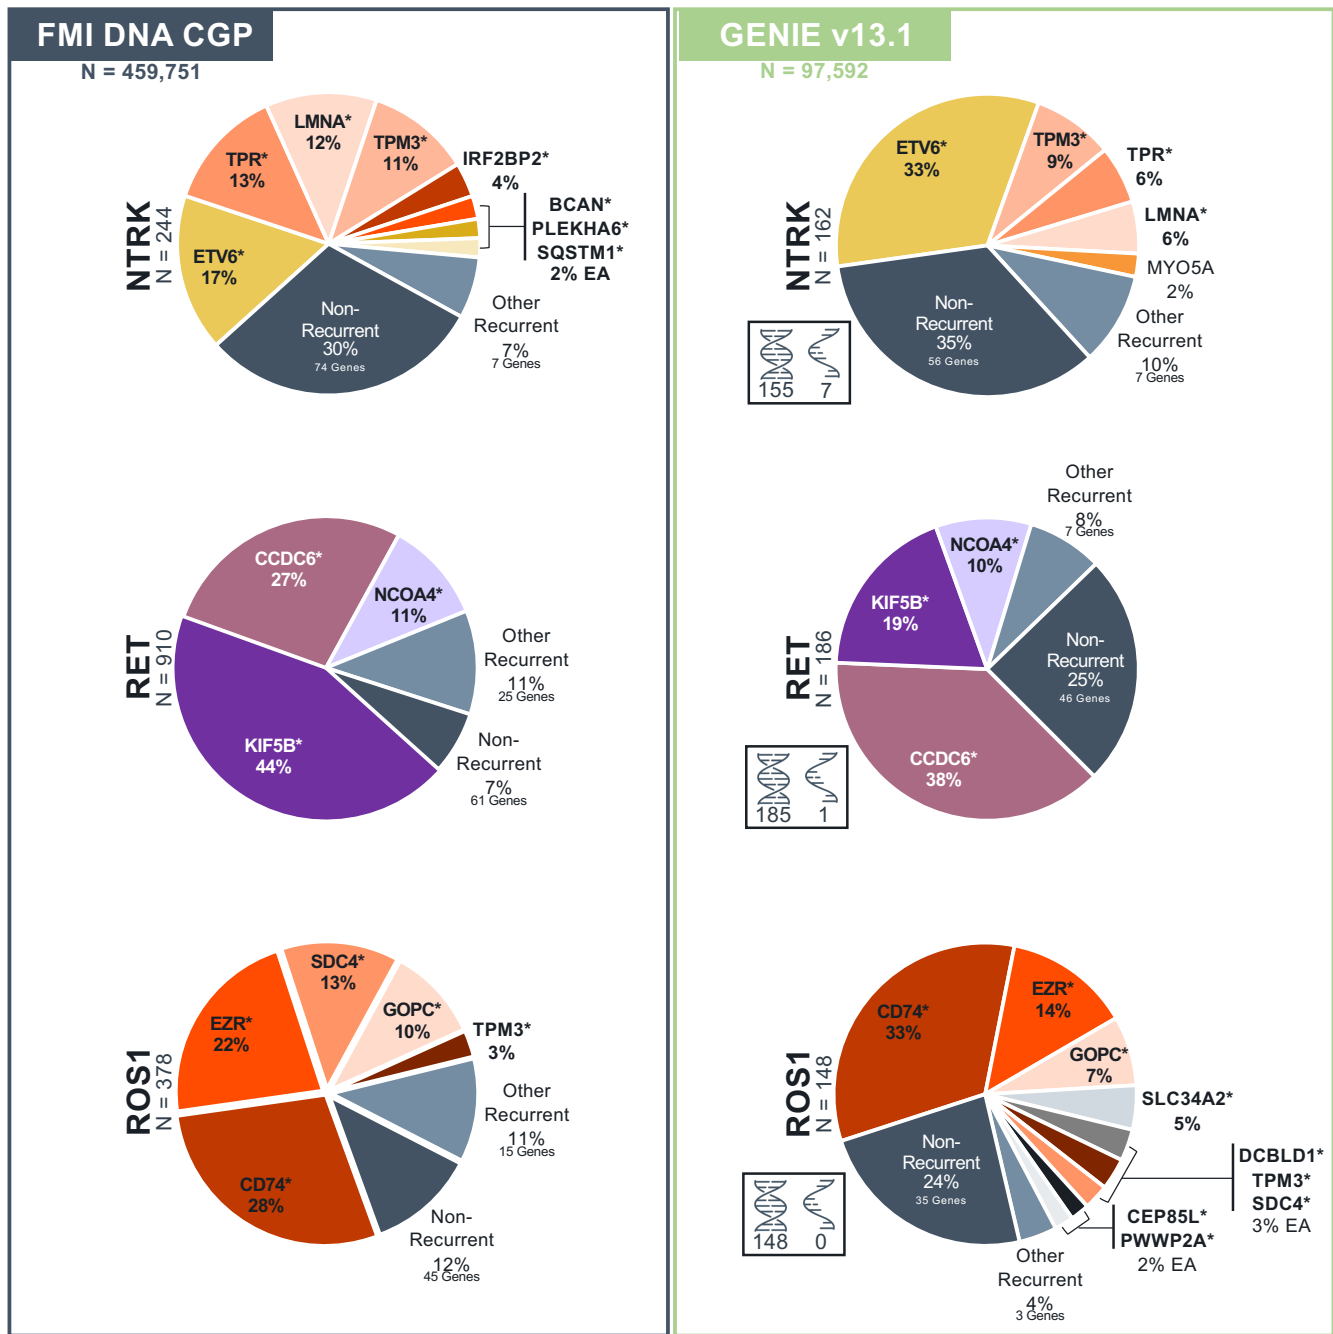

GENE NAME\* = OBSERVED AS FUSION PARTNER IN BOTH COHORTS

**Supplemental Figure 1. FMI DNA CGP Fusion Partner Diversity** Prevalence of partner genes involved in *ALK*, *BRAF*, *FGFR2*, *FGFR3*, *NTRK1/2/3*, *RET*, and *ROS1* fusions. Partner genes representing  $\geq 2\%$  of observed fusions are plotted individually while recurrent partners representing  $< 2\%$  of observed fusions and non-recurrent partners are grouped. Asterisk (\*) indicates partner gene was detected using both FMI DNA CGP and non-FMI assays in the AACR GENIE v13.1 data set. Ns below assay names denote the number of unique patients with structural variant profiling in the relevant cohort. Ns adjacent to gene names denote the number of fusion events detected in the relevant cohort. The number of fusion events with DNA and RNA evidence in GENIE is also indicated. (Note that fusions may be supported by both types of evidence.) †While *FGFR2-NPM1* rearrangements were detected on F1CDx/F1, they were considered variants of uncertain significance (VUS). FMI DNA CGP, Foundation Medicine Tissue DNA Comprehensive Genomic Profiling.

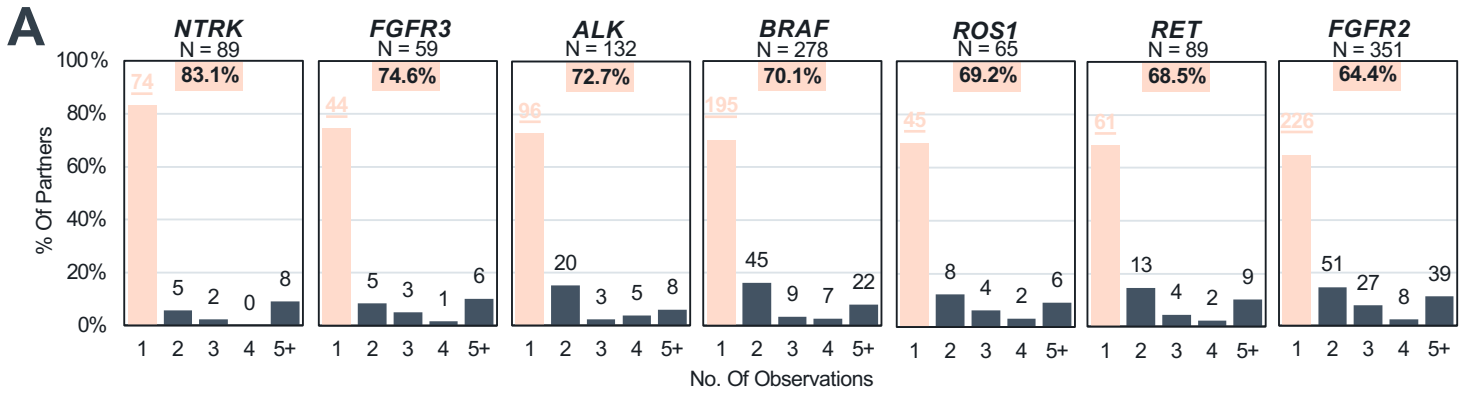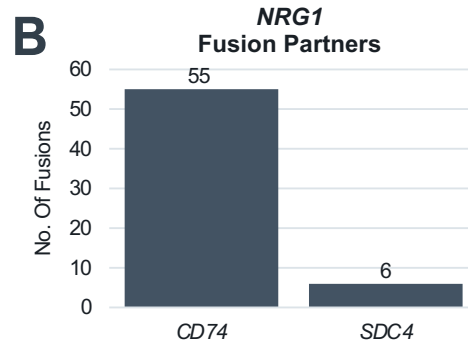

**Supplemental Figure 2. FMI DNA CGP Fusion Detection Additional Data (Related To Figure 2).** A) Percentage of fusion partners observed a single –versus– multiple times with each clinically actionable fusion gene. The total number of fusion partners observed with each gene is indicated above the plots. The number of fusions partners observed with each gene in each observation category (1-5+) is also indicated. B) No. of detected *NRG1* fusions involving baited gene partners in tissue biopsies profiled using F1CDx (N = 316,152). FMI DNA CGP, Foundation Medicine Tissue DNA Comprehensive Genomic Profiling.

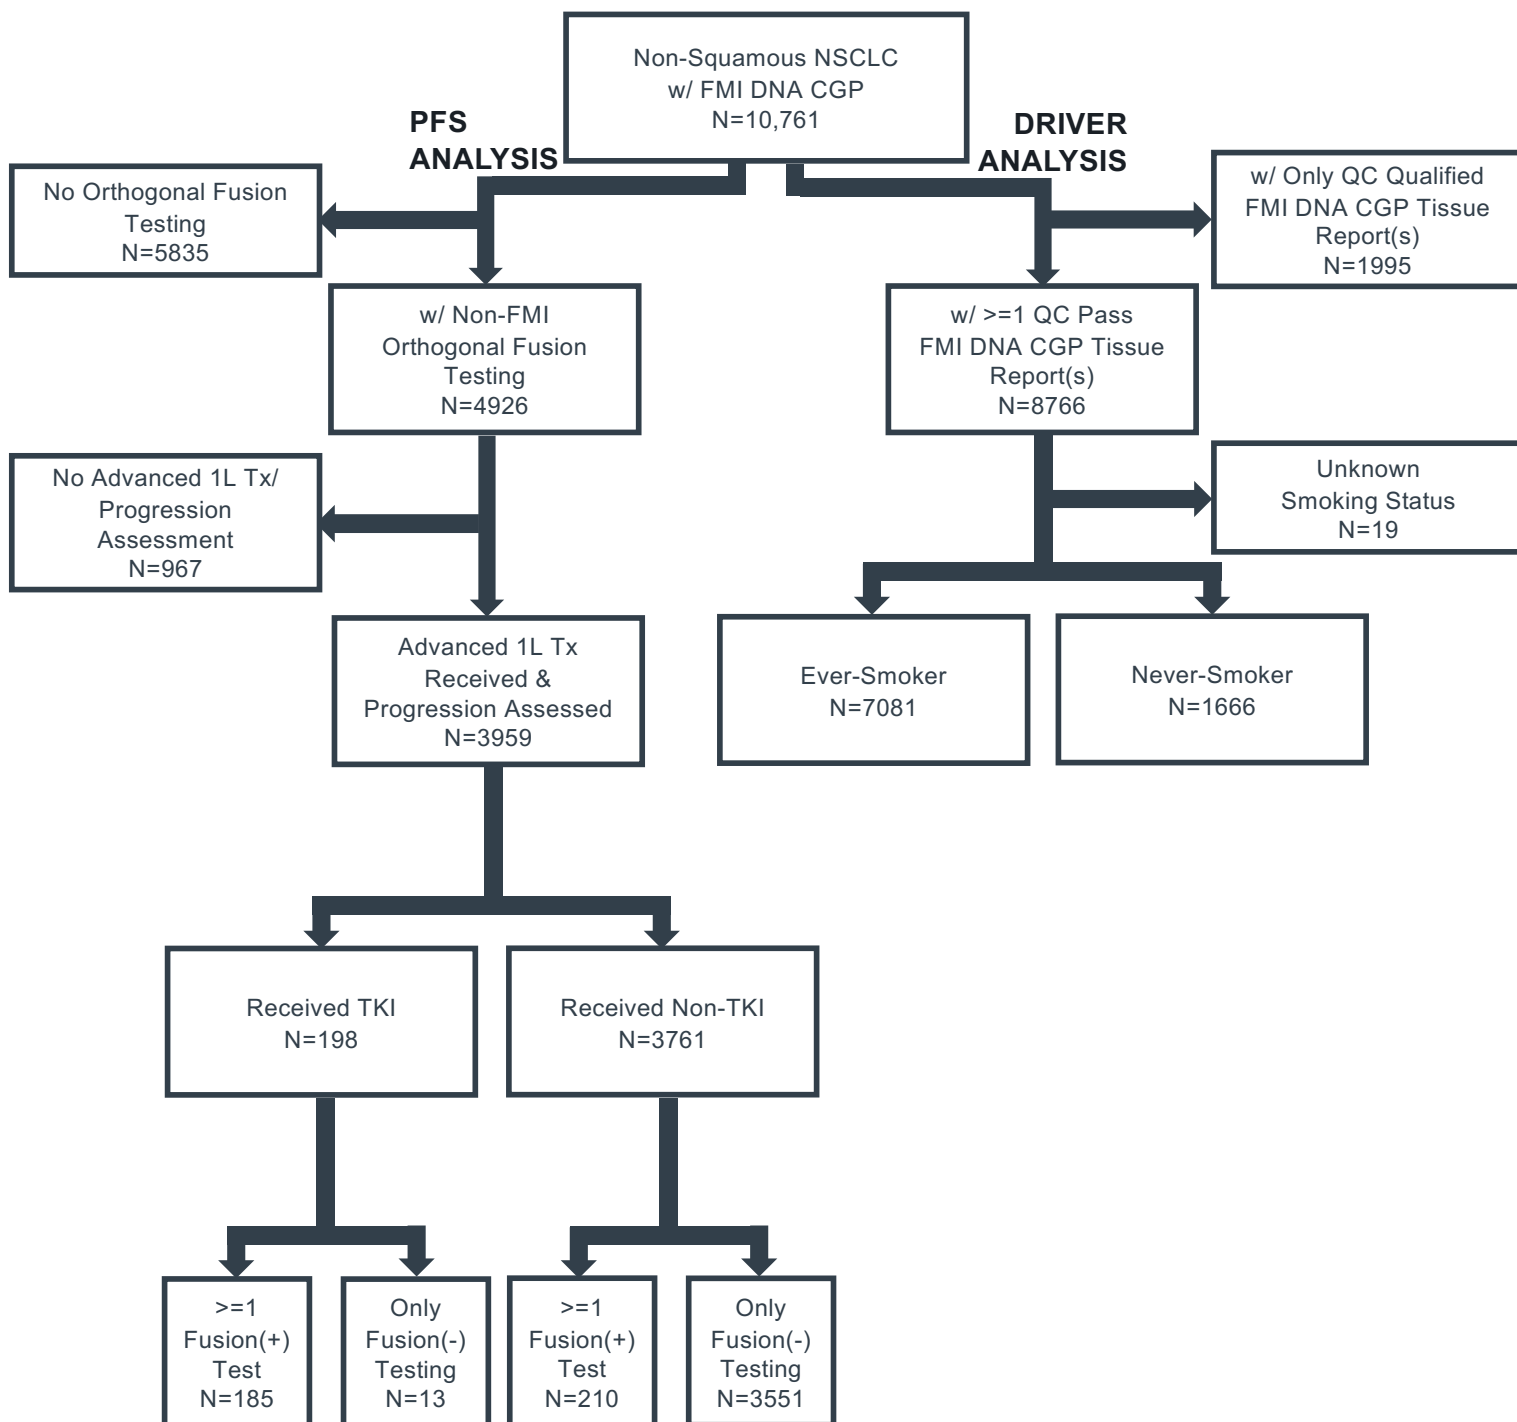

**Supplemental Figure 3. CONSORT Diagram For Non-Squamous NSCLC Clinicogenomic Analyses** The clinicogenomic cohort consisted of patients with histology/genomics consistent with non-squamous NSCLC who underwent FMI DNA CGP (N = 10,761). (Left) For the PFS analysis (Figure 3), patients 1) with both tissue-based FMI DNA CGP and fusion testing using an orthogonal method through which 2) an *ALK*, *NTRK*, *RET*, or *ROS1* fusion was identified in  $\geq 1$  test and who 3) received a matched TKI in the advanced 1L and 4) were assessed for progression were included. (Right) For the oncogenic driver analysis (Figure 4), patients with qualified reports were excluded due to the possibility of reduced sensitivity for alteration detection. The cohort was divided into ever-smokers and never-smokers based on self-reported smoking history and patients with unknown smoking history were excluded. FMI DNA CGP, Foundation Medicine Tissue DNA Comprehensive Genomic Profiling.

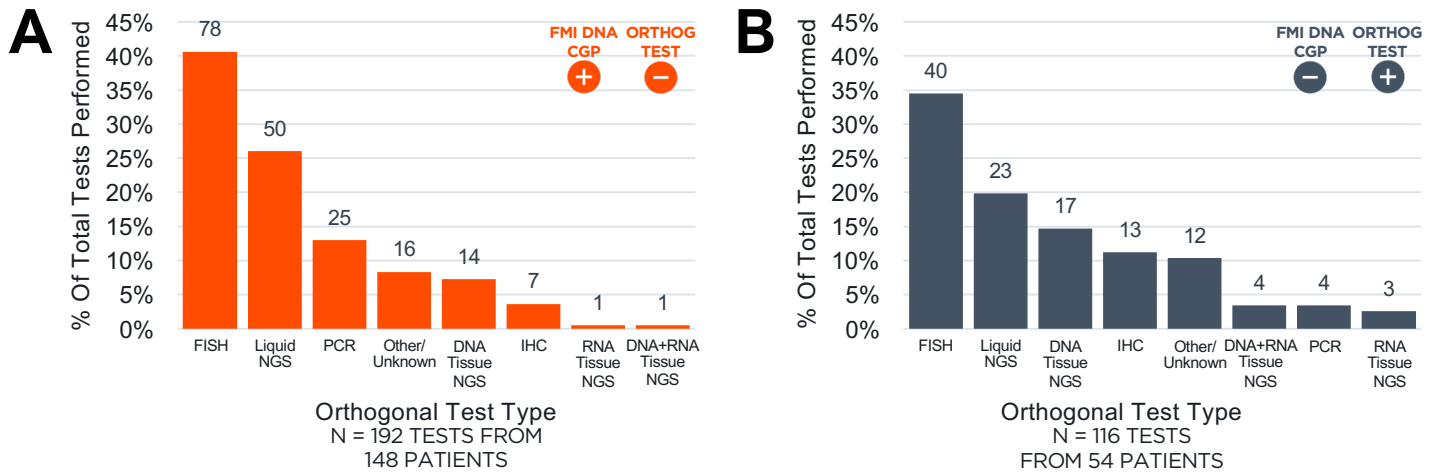

**Supplemental Figure 4. Orthogonal Testing Methods For Non-Squamous NSCLC Patients With Discordant FMI DNA CGP And Orthogonal Fusion Testing Results** Distribution of orthogonal testing modalities undergone by A) N = 148 patients who were assessed for progression and were found to be fusion-positive on FMI DNA CGP and fusion-negative on orthogonal testing (FMI DNA CGP+/Orthog-) and B) N = 54 patients who were assessed for progression and were found to be fusion-negative on FMI DNA CGP and fusion-positive on orthogonal testing (FMI DNA CGP-/Orthog+). Each testing modality is only counted once per patient. However, a single patient could be counted towards multiple modalities if a patient underwent multiple types of testing such that the sum of all bars may exceed 100%. FMI DNA CGP, Foundation Medicine Tissue DNA Comprehensive Genomic Profiling.

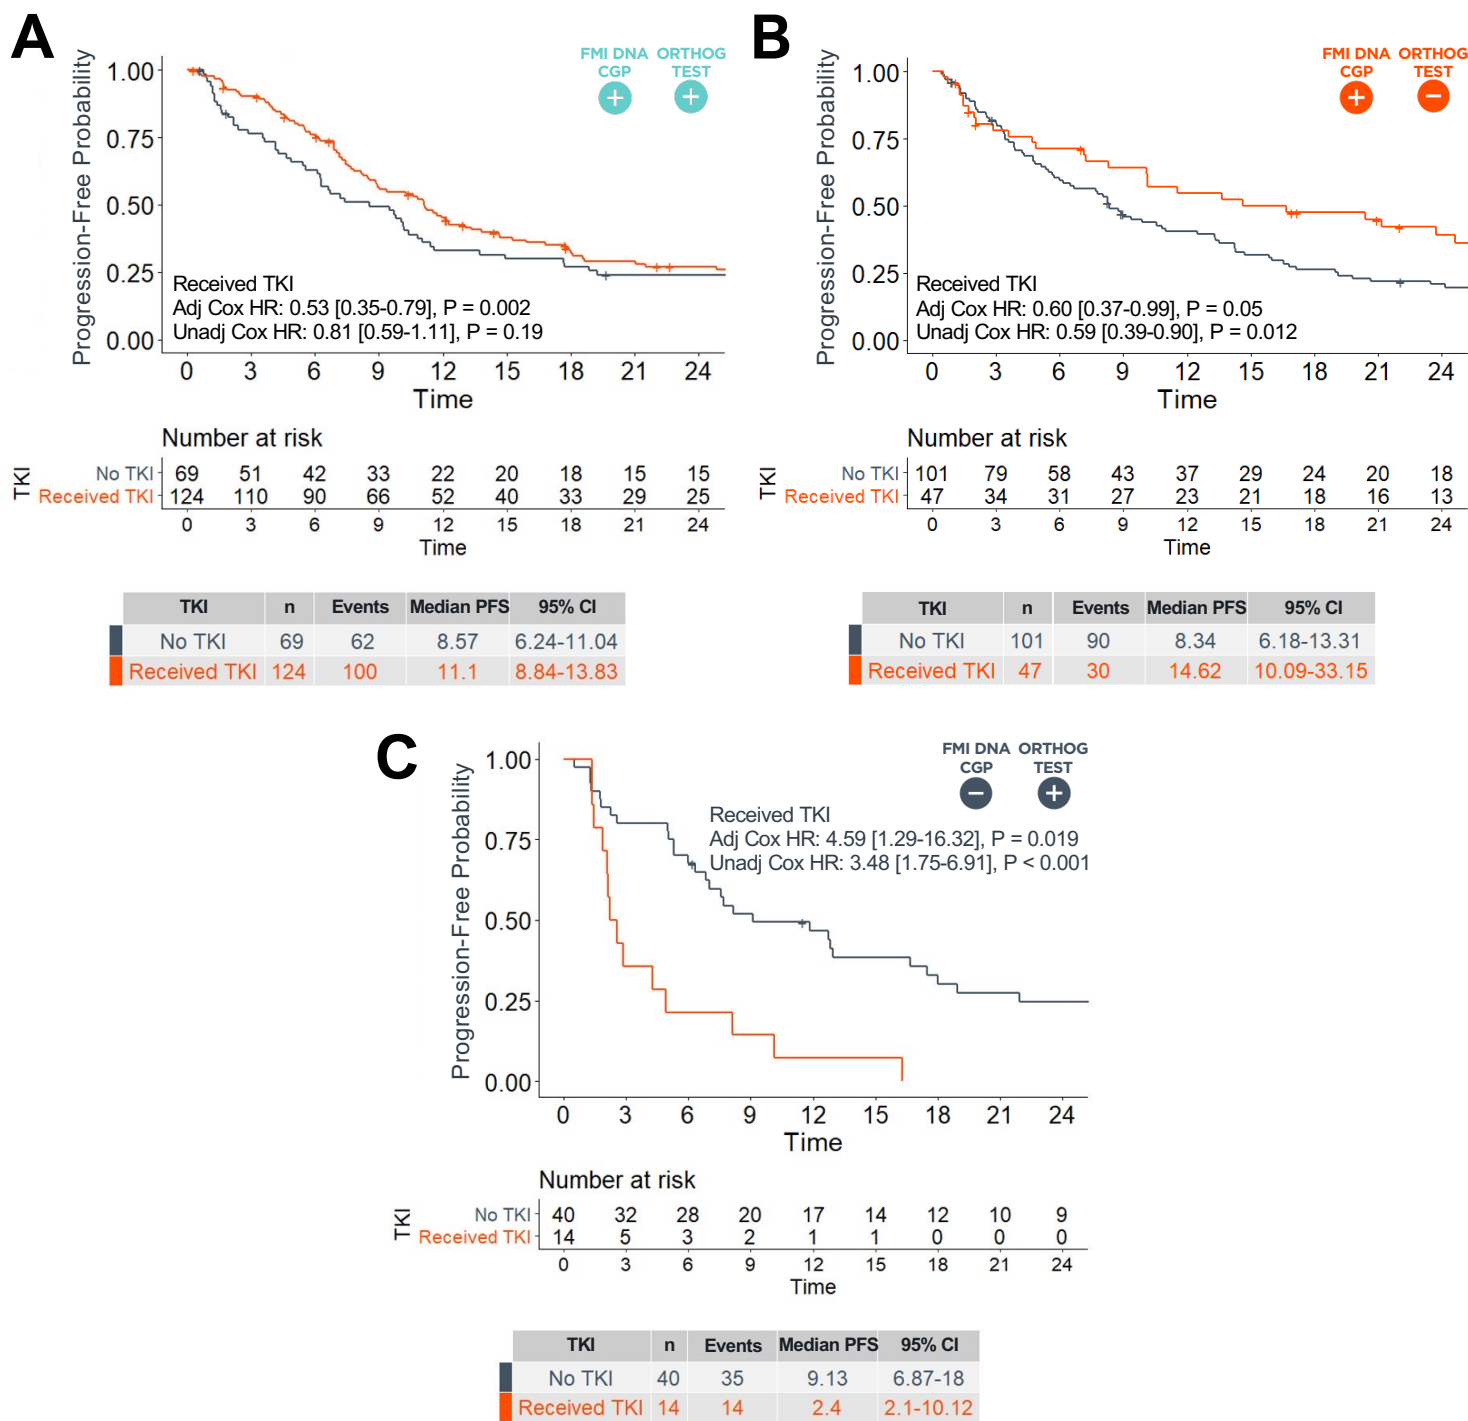

**Supplemental Figure 5. Non-Squamous NSCLC rwPFS Associations According To Fusion Testing Results And 1L Therapy Class Received** Patients with non-squamous NSCLC who were assessed for progression and underwent both FMI DNA CGP and additional fusion testing were stratified by 1L therapy class (i.e., matched TKI versus other). Unadjusted Kaplan-Meier plots are shown for patients who (A) had *ALK*, *NTRK*, *RET*, or *ROS1* fusions detected on both FMI DNA CGP and orthogonal testing (FMI DNA CGP+/Orthog+), (B) had *ALK*, *NTRK*, *RET*, or *ROS1* fusions detected on FMI DNA CGP but not orthogonal testing (FMI DNA CGP+/Orthog-) or (C) had *ALK*, *NTRK*, *RET*, or *ROS1* fusions detected on orthogonal testing but not FMI DNA CGP (FMI DNA CGP-/Orthog+). Analyses are indexed to the start of 1L therapy. In addition to univariable Cox model HRs, adjusted HRs are presented for a multivariable Cox model that includes established prognostic variables (see **Supplementary Figure 6**). FMI DNA CGP, Foundation Medicine Tissue DNA Comprehensive Genomic Profiling; HR, Hazard Ratio; TKI, Tyrosine Kinase Inhibitor; rwPFS, Real-World Progression Free Survival.

**A**

FMI DNA ORTHOG  
CGP TEST  
+ +

N = 178

| Variable                                  |                           | N Events          | Hazard ratio      | p     |
|-------------------------------------------|---------------------------|-------------------|-------------------|-------|
| TKI                                       | No TKI                    | 62 55             | Reference         |       |
|                                           | Received TKI              | 116 93            | 0.53 (0.35, 0.79) | 0.002 |
| Socioeconomic status                      | 1 - Lowest SES            | 16 13             | Reference         |       |
|                                           | 2                         | 25 16             | 0.71 (0.32, 1.59) | 0.404 |
|                                           | 3                         | 45 43             | 1.41 (0.71, 2.82) | 0.329 |
|                                           | 4                         | 41 32             | 1.25 (0.61, 2.56) | 0.542 |
|                                           | 5 - Highest SES           | 51 44             | 1.92 (0.94, 3.92) | 0.072 |
| Practice type                             | Academic                  | 43 37             | Reference         |       |
|                                           | Academic/Community        | 8 7               | 0.85 (0.33, 2.20) | 0.738 |
|                                           | Community                 | 127 104           | 1.00 (0.65, 1.54) | 0.993 |
| Gender                                    | Female                    | 95 83             | Reference         |       |
|                                           | Male                      | 83 65             | 1.19 (0.79, 1.80) | 0.407 |
| Race                                      | Asian                     | 14 11             | Reference         |       |
|                                           | Black or African American | 12 10             | 0.80 (0.30, 2.10) | 0.650 |
|                                           | Other Race                | 27 24             | 0.60 (0.27, 1.34) | 0.211 |
|                                           | Unknown/not documented    | 5 2               | 0.34 (0.07, 1.73) | 0.193 |
|                                           | White                     | 120 101           | 0.65 (0.32, 1.32) | 0.233 |
| Stage at diagnosis                        | Stage I-III               | 34 28             | Reference         |       |
|                                           | Stage IV                  | 144 120           | 0.83 (0.50, 1.38) | 0.472 |
| Smoking status                            | History of smoking        | 65 54             | Reference         |       |
|                                           | No history of smoking     | 113 94            | 0.90 (0.60, 1.34) | 0.605 |
| Age at start of systemic line of therapy  | 0                         | 178               | Reference         |       |
|                                           | 1                         | 67 53             | 1.74 (1.08, 2.81) | 0.023 |
|                                           | 2                         | 57 45             | 1.71 (0.71, 4.09) | 0.229 |
|                                           | 3                         | 4 4               | 2.40 (0.74, 7.84) | 0.146 |
|                                           | Unknown                   | 40 39             | 1.64 (0.97, 2.75) | 0.063 |
| Opioids immediately prior to therapy      | 44                        | 1.28 (0.80, 2.04) | 0.300             |       |
| Presence of pretherapy bone metastases    | 92                        | 1.58 (1.01, 2.47) | 0.043             |       |
| Presence of pretherapy CNS metastases     | 54                        | 1.34 (0.89, 2.01) | 0.162             |       |
| Presence of pretherapy liver metastases   | 48                        | 1.86 (1.14, 3.02) | 0.012             |       |
| Presence of pretherapy adrenal metastases | 18                        | 1.34 (0.70, 2.57) | 0.374             |       |
| Presence of other pretherapy metastases   | 124                       | 1.17 (0.76, 1.80) | 0.482             |       |

**B**

FMI DNA ORTHOG  
CGP TEST  
+ -

N = 130

| Variable                                  |                           | N Events           | Hazard ratio       | p    |
|-------------------------------------------|---------------------------|--------------------|--------------------|------|
| TKI                                       | No TKI                    | 87 78              | Reference          |      |
|                                           | Received TKI              | 43 28              | 0.60 (0.37, 0.99)  | 0.05 |
| Socioeconomic status                      | 1 - Lowest SES            | 12 10              | Reference          |      |
|                                           | 2                         | 17 13              | 0.42 (0.16, 1.07)  | 0.07 |
|                                           | 3                         | 42 36              | 0.64 (0.27, 1.48)  | 0.30 |
|                                           | 4                         | 24 19              | 0.69 (0.28, 1.70)  | 0.42 |
|                                           | 5 - Highest SES           | 35 28              | 0.60 (0.26, 1.41)  | 0.24 |
| Practice type                             | Academic                  | 28 19              | Reference          |      |
|                                           | Academic/Community        | 2 2                | 2.04 (0.39, 10.70) | 0.40 |
|                                           | Community                 | 100 85             | 1.18 (0.63, 2.21)  | 0.61 |
| Gender                                    | Female                    | 78 63              | Reference          |      |
|                                           | Male                      | 52 43              | 0.98 (0.60, 1.61)  | 0.95 |
| Race                                      | Asian                     | 2 1                | Reference          |      |
|                                           | Black or African American | 8 5                | 2.71 (0.29, 24.88) | 0.38 |
|                                           | Other Race                | 22 19              | 4.66 (0.57, 38.04) | 0.15 |
|                                           | Unknown/not documented    | 11 11              | 3.08 (0.37, 25.43) | 0.30 |
|                                           | White                     | 87 70              | 2.95 (0.38, 22.88) | 0.30 |
| Stage at diagnosis                        | Stage I-III               | 27 22              | Reference          |      |
|                                           | Stage IV                  | 103 84             | 0.98 (0.54, 1.81)  | 0.96 |
| Smoking status                            | History of smoking        | 50 47              | Reference          |      |
|                                           | No history of smoking     | 80 59              | 0.59 (0.37, 0.93)  | 0.02 |
| Age at start of systemic line of therapy  | 0                         | 130                | Reference          |      |
|                                           | 1                         | 48 42              | 1.00 (0.97, 1.02)  | 0.66 |
|                                           | 2                         | 8 8                | 0.86 (0.51, 1.45)  | 0.57 |
|                                           | 3                         | 11 11              | 1.11 (0.40, 3.08)  | 0.84 |
|                                           | Unknown                   | 23 17              | 1.19 (0.60, 2.36)  | 0.62 |
| Opioids immediately prior to therapy      | 31                        | 1.32 (0.72, 2.41)  | 0.36               |      |
| Presence of pretherapy bone metastases    | 47                        | 1.34 (0.79, 2.26)  | 0.27               |      |
| Presence of pretherapy CNS metastases     | 35                        | 0.98 (0.53, 1.81)  | 0.95               |      |
| Presence of pretherapy liver metastases   | 16                        | 1.39 (0.69, 2.79)  | 0.35               |      |
| Presence of pretherapy adrenal metastases | 7                         | 3.41 (1.17, 10.00) | 0.03               |      |
| Presence of other pretherapy metastases   | 85                        | 1.38 (0.81, 2.37)  | 0.24               |      |

**C**

FMI DNA ORTHOG  
CGP TEST  
- +

N = 47

| Variable                                  |                           | N Events           | Hazard ratio          | p      |
|-------------------------------------------|---------------------------|--------------------|-----------------------|--------|
| TKI                                       | No TKI                    | 35 32              | Reference             |        |
|                                           | Received TKI              | 12 12              | 4.59 (1.29, 16.32)    | 0.019  |
| Socioeconomic status                      | 1 - Lowest SES            | 10 10              | Reference             |        |
|                                           | 2                         | 6 5                | 2.98 (0.58, 15.37)    | 0.192  |
|                                           | 3                         | 5 5                | 1.28 (0.18, 9.29)     | 0.804  |
|                                           | 4                         | 14 13              | 0.33 (0.10, 1.08)     | 0.066  |
|                                           | 5 - Highest SES           | 12 11              | 0.10 (0.02, 0.45)     | 0.003  |
| Practice type                             | Academic                  | 8 8                | Reference             |        |
|                                           | Academic/Community        | 1 1                | 1.49 (0.10, 23.06)    | 0.775  |
|                                           | Community                 | 38 35              | 5.33 (1.09, 26.18)    | 0.039  |
| Gender                                    | Female                    | 24 22              | Reference             |        |
|                                           | Male                      | 23 22              | 0.81 (0.29, 2.28)     | 0.692  |
| Race                                      | Asian                     | 1 1                | Reference             |        |
|                                           | Black or African American | 2 2                | 0.00 (0.00, 0.07)     | 0.003  |
|                                           | Other/unknown             | 6 5                | 0.02 (0.00, 0.75)     | 0.034  |
| Stage at diagnosis                        | Stage I-III               | 38 36              | Reference             |        |
|                                           | Stage IV                  | 15 14              | 0.57 (0.21, 1.56)     | 0.270  |
| Smoking status                            | History of smoking        | 34 32              | Reference             |        |
|                                           | No history of smoking     | 13 12              | 0.63 (0.15, 2.64)     | 0.531  |
| Age at start of systemic line of therapy  | 0                         | 47                 | Reference             |        |
|                                           | 1                         | 18 16              | 8.62 (2.98, 24.96)    | <0.001 |
|                                           | 2                         | 26 25              | 76.67 (6.05, 972.389) | 0.001  |
| Opioids immediately prior to therapy      | 10                        | 0.31 (0.09, 1.13)  | 0.077                 |        |
| Presence of pretherapy bone metastases    | 13                        | 4.77 (1.63, 13.92) | 0.004                 |        |
| Presence of pretherapy CNS metastases     | 13                        | 7.21 (1.96, 26.48) | 0.003                 |        |
| Presence of pretherapy liver metastases   | 8                         | 7.21 (1.62, 32.18) | 0.010                 |        |
| Presence of pretherapy adrenal metastases | 7                         | 1.97 (0.47, 8.27)  | 0.355                 |        |
| Presence of other pretherapy metastases   | 22                        | 0.32 (0.11, 0.94)  | 0.038                 |        |

**D**

1L TKI

N = 173

| Variable                                  |                           | N Events          | Hazard ratio      | p      |
|-------------------------------------------|---------------------------|-------------------|-------------------|--------|
| Fusion results                            | FMI DNA CGP-/Orthog+      | 14 14             | Reference         |        |
|                                           | FMI DNA CGP+/Orthog-      | 43 28             | 0.15 (0.07, 0.33) | <0.001 |
|                                           | FMI DNA CGP+/Orthog+      | 116 93            | 0.17 (0.08, 0.36) | <0.001 |
| Socioeconomic status                      | 1 - Lowest SES            | 19 15             | Reference         |        |
|                                           | 2                         | 21 13             | 0.68 (0.29, 1.60) | 0.38   |
|                                           | 3                         | 42 36             | 1.39 (0.69, 2.78) | 0.35   |
|                                           | 4                         | 38 29             | 1.01 (0.51, 2.02) | 0.97   |
|                                           | 5 - Highest SES           | 53 42             | 1.37 (0.70, 2.68) | 0.36   |
| Practice type                             | Academic                  | 40 30             | Reference         |        |
|                                           | Academic/Community        | 9 8               | 1.11 (0.44, 2.81) | 0.82   |
|                                           | Community                 | 124 97            | 1.03 (0.63, 1.67) | 0.90   |
| Gender                                    | Female                    | 96 79             | Reference         |        |
|                                           | Male                      | 77 56             | 0.86 (0.55, 1.32) | 0.48   |
| Race                                      | Asian                     | 10 6              | Reference         |        |
|                                           | Black or African American | 9 5               | 0.93 (0.26, 3.28) | 0.91   |
|                                           | Other Race                | 28 24             | 0.92 (0.34, 2.47) | 0.88   |
| Stage at diagnosis                        | Stage I-III               | 7 6               | Reference         |        |
|                                           | Stage IV                  | 119 94            | 1.19 (0.33, 4.26) | 0.79   |
| Smoking status                            | History of smoking        | 119 94            | Reference         |        |
|                                           | No history of smoking     | 24 20             | 0.95 (0.40, 2.41) | 0.96   |
| Age at start of systemic line of therapy  | 0                         | 149 115           | Reference         |        |
|                                           | 1                         | 62 52             | 1.05 (0.59, 1.87) | 0.86   |
|                                           | 2                         | 111 83            | 0.77 (0.50, 1.18) | 0.23   |
| ECOG Performance Score                    | 0                         | 173               | Reference         |        |
|                                           | 1                         | 63 48             | 1.00 (0.98, 1.02) | 0.92   |
|                                           | 2                         | 55 40             | 1.13 (0.72, 1.78) | 0.60   |
|                                           | 3                         | 11 8              | 1.21 (0.52, 2.82) | 0.66   |
| Opioids immediately prior to therapy      | 41                        | 1.58 (0.40, 6.21) | 0.51              |        |
| Presence of pretherapy bone metastases    | 41                        | 1.12 (0.66, 1.93) | 0.68              |        |
| Presence of pretherapy CNS metastases     | 41                        | 1.08 (0.67, 1.75) | 0.74              |        |
| Presence of pretherapy liver metastases   | 44                        | 1.17 (0.74, 1.84) | 0.51              |        |
| Presence of pretherapy adrenal metastases | 20                        | 1.24 (0.80, 1.93) | 0.34              |        |
| Presence of other pretherapy metastases   | 119                       | 1.62 (0.99, 2.64) | 0.05              |        |

**Supplemental Figure 6. Multivariable Cox Models For Non-Squamous NSCLC rwPFS On 1L Therapy** rwPFS for (A) patients who had *ALK*, *NTRK*, *RET*, or *ROS1* fusions detected on both FMI DNA CGP and orthogonal testing (FMI DNA CGP+/Orthog+; N = 178) stratified by receipt of a matched TKI in 1L; (B) patients who had *ALK*, *NTRK*, *RET*, or *ROS1* fusions detected on FMI DNA CGP but not orthogonal testing (FMI DNA CGP+/Orthog-; N = 130) stratified by receipt of a matched TKI in 1L; (C) patients who had *ALK*, *NTRK*, *RET*, or *ROS1* fusions detected on orthogonal testing but not FMI DNA CGP (FMI DNA CGP-/Orthog+; N = 47) stratified by receipt of a matched TKI in 1L; and (D) all patients who received a matched TKI for *ALK*, *NTRK*, *RET*, or *ROS1* fusions in 1L stratified by fusion testing results (N = 173). Patients who were negative for *ALK*, *NTRK*, *RET*, or *ROS1* fusions by both FMI DNA CGP and orthogonal testing (FMI DNA CGP-/Orthog-) were excluded from this analysis. Adjustment variables included clinical characteristics which could impact prognosis. Missing Socioeconomic Status and ECOG Performance Score were not imputed, therefore patients missing either of these values were also excluded. For binary variables (pretherapy opioids and pretherapy metastases), the N column shows the number of patients positive for that characteristic. In all analyses, either missing values were imputed or cases with missing values were excluded, as noted above. FMI DNA CGP, Foundation Medicine Tissue DNA Comprehensive Genomic Profiling; HR, Hazard Ratio; TKI, Tyrosine Kinase Inhibitor; rwPFS, Real-World Progression Free Survival.



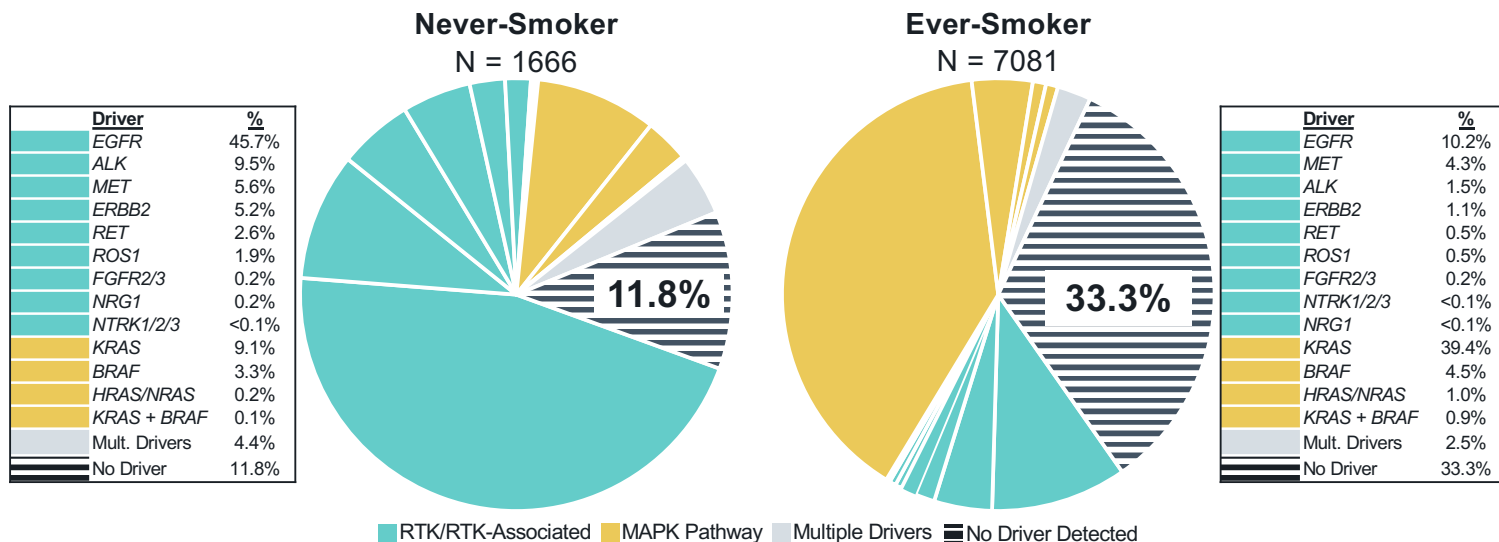

**Supplemental Figure 7. An Oncogenic Driver Is Not Detected In A Minority (12-33%) Of Non-Squamous NSCLC Using DNA CGP** Tumors were classified as having an oncogenic driver if activating alterations were detected in select RTK/MAPK pathway genes (see **Supplementary Table 3**). The distribution of detected oncogenic drivers in ever-smoker and never-smoker subpopulations is shown. MAPK, Mitogen-Activated Protein Kinase; RTK, Receptor Tyrosine Kinase.



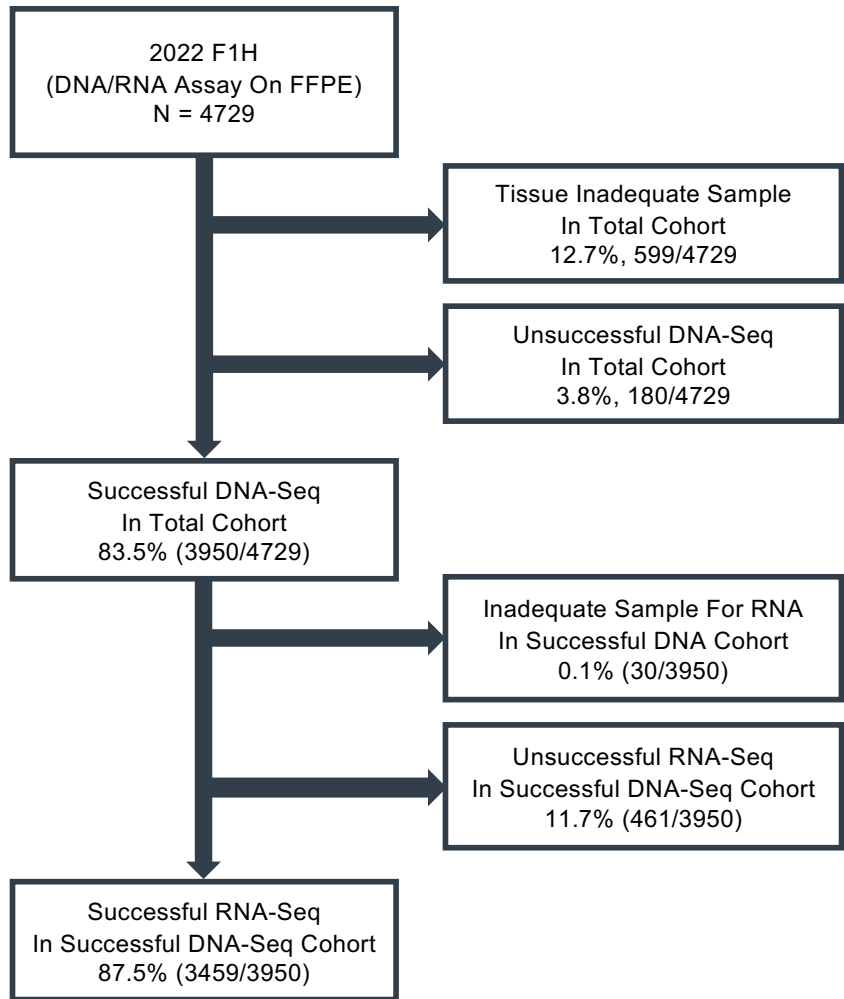

**Supplemental Figure 8. FoundationOne®Heme (F1H) DNA/RNA Analyte Sequencing Success Rates (2022)**

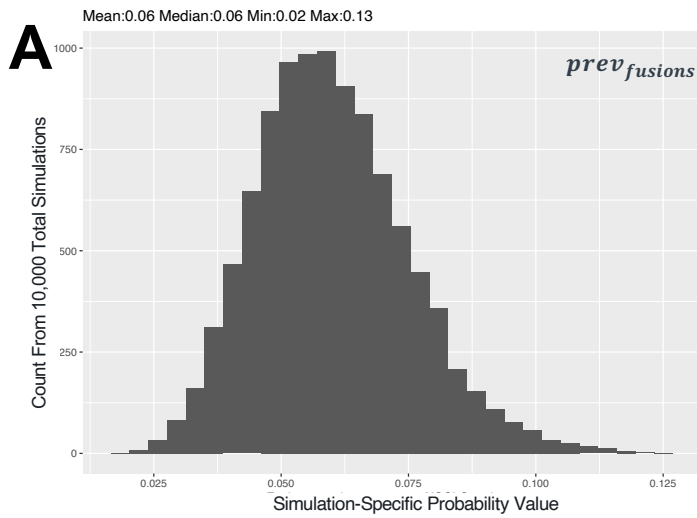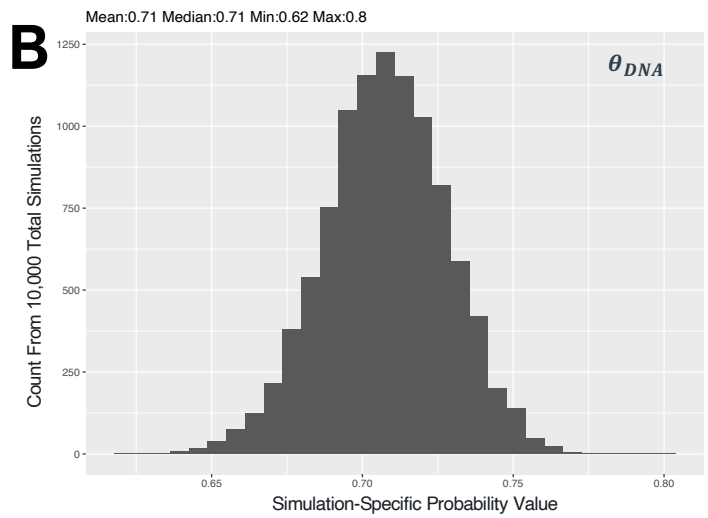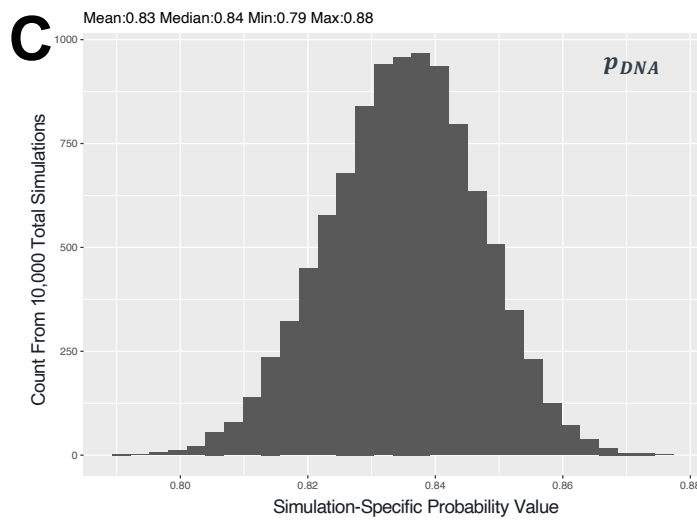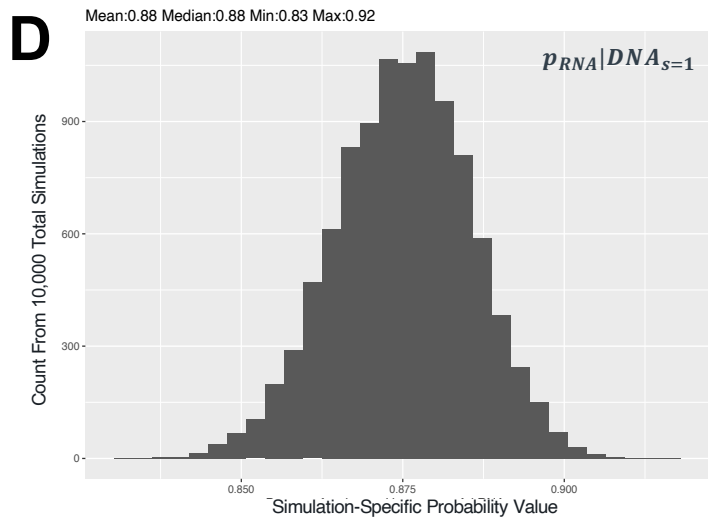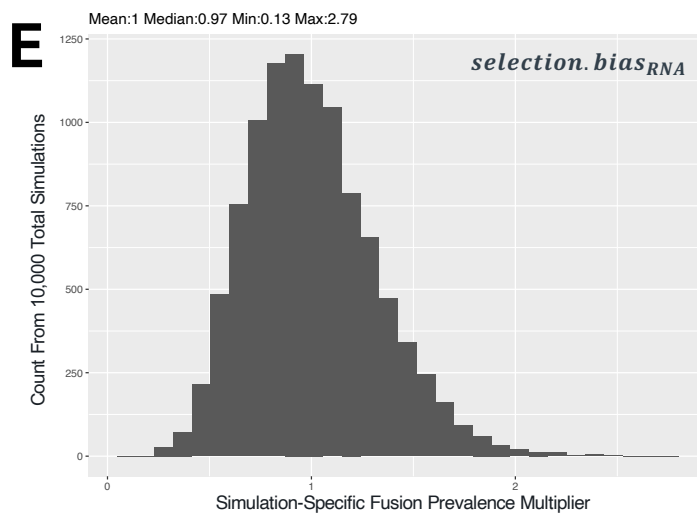

**Supplemental Figure 9. Parameter Distributions For Probabilistic Sensitivity Analysis** Distributions of individual parameter draws with summary statistics used to generate the probabilistic sensitivity analysis (see **Figure 5B**). Distributional parameters are defined in **Supplementary Table 3**. **A:** *prev\_fusions* **B:**  $\theta_{DNA}$  **C:**  $p_{DNA}$  **D:**  $p_{RNA|DNA_{s=1}}$  **E:** *selection.bias<sub>RNA</sub>*.

**Supplemental Table 1. Summary Of Intronic Coverage On FoundationOne®CDx For Rearrangement Detection**

**EXONIC + SELECT INTRONIC COVERAGE N = 21**

|                                        |                                   |                               |                                              |                              |
|----------------------------------------|-----------------------------------|-------------------------------|----------------------------------------------|------------------------------|
| <b>ALK</b><br>Introns 18,19            | <b>BCL2</b><br>3' UTR             | <b>BRAF</b><br>Introns 7-10   | <b>BRCA1</b><br>Introns<br>2,7,8,12,16,19,20 | <b>BRCA2</b><br>Intron 2     |
| <b>EGFR</b><br>Introns<br>7, 15, 24-27 | <b>FGFR1</b><br>Introns 1, 5, 17  | <b>FGFR2</b><br>Introns 1, 17 | <b>FGFR3</b><br>Introns 17                   | <b>KIT</b><br>Intron 16      |
| <b>KMT2A (MLL)</b><br>Introns 6-11     | <b>MSH2</b><br>Intron 5           | <b>MYC</b><br>Intron 1        | <b>NOTCH2</b><br>Intron 26                   | <b>NTRK1</b><br>Introns 8-11 |
| <b>NTRK2</b><br>Intron 12              | <b>PDGFRA</b><br>Introns 7, 9, 11 | <b>RAF1</b><br>Introns 4-8    | <b>RARA</b><br>Intron 2                      | <b>RET</b><br>Introns 7-11   |
| <b>ROS1</b><br>Introns 31-35           |                                   |                               |                                              |                              |

**SELECT INTRONIC COVERAGE ONLY N = 13**

| Gene           | Introns Covered | Solid Tumor<br>Common Fusion Partner Gene(s)                                     |
|----------------|-----------------|----------------------------------------------------------------------------------|
| <b>BCR</b>     | 8, 13, 14       | <i>NTRK2</i> (CNS Tumors)                                                        |
| <b>CD74</b>    | 6-8             | <i>NRG1</i> (NSCLC); <i>NTRK1</i> (Pan-Solid);<br><i>ROS1</i> (NSCLC, Pan-Solid) |
| <b>ETV4</b>    | 8               | <i>TMPRSS2</i> (Prostate)                                                        |
| <b>ETV5</b>    | 6, 7            | <i>TMPRSS2</i> (Prostate)                                                        |
| <b>ETV6</b>    | 5, 6            | <i>NTRK3</i> (Pan-Solid)                                                         |
| <b>EWSR1</b>   | 7-13            | Multiple Partners (Sarcoma, Prostate)                                            |
| <b>EZR</b>     | 9-11            | <i>ROS1</i> (NSCLC, Pan-Solid)                                                   |
| <b>MYB</b>     | 14              | <i>NFIB</i> (Adenoid Cystic Carcinomas)                                          |
| <b>NUTM1</b>   | 1               | <i>BRD4</i> (NUT Midline Carcinoma)                                              |
| <b>RSPO2</b>   | 1               | Multiple Partners, e.g., <i>EIF3E</i> (CRC)                                      |
| <b>SDC4</b>    | 2               | <i>NRG1</i> (Pan-Solid); <i>ROS1</i> (NSCLC)                                     |
| <b>SLC34A2</b> | 4               | <i>ROS1</i> (NSCLC)                                                              |
| <b>TMPRSS2</b> | 1-3             | <i>ERG</i> , <i>ETV1</i> , <i>ETV4</i> , <i>ETV5</i> (Prostate)                  |

**Supplemental Table 2. Non-Squamous NSCLC Patient Cohort Clinical Characteristics**

|                                       | <b>Total Cohort</b> |
|---------------------------------------|---------------------|
|                                       | <i>N</i> =10761     |
| Age At Diagnosis, Years, Median (IQR) | 67.0 [60.0;74.0]    |
| Sex, <i>n</i> (%)                     |                     |
| Female                                | 5971 (55.5%)        |
| Male                                  | 4790 (44.5%)        |
| Self-Reported Race, <i>n</i> (%)      |                     |
| Asian                                 | 361 (3.35%)         |
| Black or African American             | 722 (6.71%)         |
| Hispanic or Latino                    | 8 (0.07%)           |
| Other Race                            | 1502 (14.0%)        |
| White                                 | 7166 (66.6%)        |
| Unknown/Not Documented                | 1002 (9.31%)        |
| AJCC Stage At Diagnosis, <i>n</i> (%) |                     |
| I                                     | 1330 (12.4%)        |
| II                                    | 843 (7.83%)         |
| III                                   | 2084 (19.4%)        |
| IV                                    | 6164 (57.3%)        |
| Other/Unknown/Not Documented          | 340 (3.16%)         |
| Smoking History, <i>n</i> (%)         |                     |
| History Of Smoking                    | 8643 (80.3%)        |
| No History Of Smoking                 | 2095 (19.5%)        |
| Unknown/Not Documented                | 23 (0.21%)          |
| Practice Type, <i>n</i> (%)           |                     |
| Academic                              | 1270 (11.8%)        |
| Academic/Community                    | 608 (5.65%)         |
| Community                             | 8883 (82.5%)        |
| Socioeconomic Status, <i>n</i> (%)    |                     |
| 1 - Lowest SES                        | 1459 (13.6%)        |
| 2                                     | 1865 (17.3%)        |
| 3                                     | 2187 (20.3%)        |
| 4                                     | 2248 (20.9%)        |
| 5 - Highest SES                       | 2073 (19.3%)        |
| Unknown                               | 929 (8.63%)         |
| ECOG PS At Diagnosis, <i>n</i> (%)    |                     |
| 0                                     | 2179 (20.2%)        |
| 1                                     | 2253 (20.9%)        |
| 2                                     | 578 (5.37%)         |
| 3+                                    | 153 (1.42%)         |
| Unknown                               | 5598 (52.0%)        |

**Supplemental Table 3. Parameter Inputs For Deterministic And Probabilistic Sensitivity Analyses**

| Parameter Description  |                                                                                                            | Base Case Estimate | Min   | Max   | Distribution  | Justification                                                                                                                                                                                                           |
|------------------------|------------------------------------------------------------------------------------------------------------|--------------------|-------|-------|---------------|-------------------------------------------------------------------------------------------------------------------------------------------------------------------------------------------------------------------------|
| $prev_{fusions}$       | Estimated NCCN driver fusion prevalence in the NSCLC patient population                                    | 6.0%               | 1.6%  | 10.4% | Beta(15,235)  | Based on combined fusion prevalence estimates for <i>ALK</i> , <i>RET</i> , <i>ROS1</i> , and <i>NTRK1/2/3</i> from the literature (see <b>Methods</b> )                                                                |
| $\theta_{DNA}$         | Probability of detecting an oncogenic driver alteration on DNA CGP                                         | 70.8%              | 66.7% | 88.2% | Beta(354,146) | 6,194/8,747 patients observed with driver alterations on FMI DNA CGP (4,724/7,081 Ever-Smoker & 1,470/1,666 Never-Smoker; see <b>Figure 4</b> )                                                                         |
| $p_{DNA}$              | Probability of DNA CGP assay technical success                                                             | 83.5%              | 80%   | 90%   | Beta(835,165) | Calculated based on experience w/ FoundationOne Heme (see <b>Supplementary Figure 6</b> )                                                                                                                               |
| $p_{RNA DNA_{s=1}}$    | Probability of RNA CGP assay technical success given prior DNA CGP assay technical success                 | 87.5%              | 85%   | 92%   | Beta(875,125) | Calculated based on experience w/ FoundationOne Heme (see <b>Supplementary Figure 6</b> ); 92% UB based on <b>Benayed et al.</b> <sup>14</sup>                                                                          |
| $selection.bias_{RNA}$ | Multiplier for enrichment of fusion-positive patients in the cohort without a driver identified on DNA CGP | 1                  | 1     | 1.2   | Gamma(10,10)  | BC and LB selection bias assumed as 0 (x1 multiplier for fusion prevalence). UB based on % fusion-positive patients from MSK-IMPACT versus reflex to MSK-Fusion testing (~x1.2) [ <b>Benayed et al.</b> <sup>14</sup> ] |

BC, Base Case; FMI DNA CGP, Foundation Medicine Tissue DNA Comprehensive Genomic Profiling; LB, Lower Bound; UB, Upper Bound

**Supplemental Table 4. NSCLC RTK/MAPK Oncogenic Driver Alterations**

| <b>Gene</b>  | <b>Classification</b> | <b>Activating Alteration Types</b> |
|--------------|-----------------------|------------------------------------|
| <i>ALK</i>   | RTK                   | RE                                 |
| <i>EGFR</i>  | RTK                   | MUT                                |
| <i>ERBB2</i> | RTK                   | MUT                                |
| <i>FGFR2</i> | RTK                   | RE                                 |
| <i>FGFR3</i> | RTK                   | RE                                 |
| <i>MET</i>   | RTK                   | MUT, AMP                           |
| <i>NRG1</i>  | RTK-Associated        | RE                                 |
| <i>NTRK1</i> | RTK                   | RE                                 |
| <i>NTRK2</i> | RTK                   | RE                                 |
| <i>NTRK3</i> | RTK                   | RE                                 |
| <i>RET</i>   | RTK                   | RE                                 |
| <i>ROS1</i>  | RTK                   | RE                                 |
| <i>BRAF</i>  | MAPK                  | MUT                                |
| <i>HRAS</i>  | MAPK                  | MUT                                |
| <i>KRAS</i>  | MAPK                  | MUT                                |
| <i>NRAS</i>  | MAPK                  | MUT                                |

AMP, Amplification; MUT, Mutation (Substitutions & Short Insertions/Deletions); RE, Rearrangement; MAPK, Mitogen-Activated Protein Kinase; RTK, Receptor Tyrosine Kinase

**Supplemental Table 5. Fusion Partner Genes Detected Using FMI DNA CGP & Non-FMI Assays In AACR Project GENIE v13.1.xlsx**



**Supplemental Table 6. Estimates From One-Way Sensitivity Analysis Corresponding to Figure 5A**

| Parameter              | Expected % Of Patients With RNA-Only Fusion Result |      |      |
|------------------------|----------------------------------------------------|------|------|
|                        | Base Case                                          | Min  | Max  |
| $prev_{fusions}$       | 1.28                                               | 0.34 | 2.22 |
| $\theta_{DNA}$         |                                                    | 1.46 | 0.52 |
| $p_{DNA}$              |                                                    | 1.23 | 1.38 |
| $p_{RNA DNA_{S=1}}$    |                                                    | 1.24 | 1.35 |
| $selection.bias_{RNA}$ |                                                    | 1.28 | 1.54 |
